# Supplementary material for: A β-synuclein mutation linked to dementia produces neurodegeneration when expressed in mouse brain
Source: PubMed Central journal article supplement — Nat Commun. 2010 Nov 2;1:110–. doi: 10.1038/ncomms1101 (PMC3060620; doi:10.1038/ncomms1101), 2010-11-02
Supplement: ncomms1101-s1.pdf [file ncomms1101-s1.pdf]

## **A $\beta$ -synuclein mutation linked to dementia produces neurodegeneration when expressed in mouse brain**

Masayo Fujita<sup>1</sup>, Shuei Sugama<sup>1</sup>, Kazunari Sekiyama<sup>1</sup>, Akio Sekigawa<sup>1</sup>, Tohru Tsukui<sup>2</sup>, Masaaki Nakai<sup>1</sup>, Masaaki Waragai<sup>1</sup>, Takato Takenouchi<sup>1,3</sup>, Yoshiki Takamatsu<sup>1</sup>, Jianshe Wei<sup>1</sup>, Edward Rockenstein<sup>4</sup>, Albert R. LaSpada<sup>5-9</sup>, Eliezer Masliah<sup>4</sup>, Satoshi Inoue<sup>2,10</sup>, Makoto Hashimoto<sup>1</sup>

The Supplementary information contains:

- Supplementary Figures (S1, S2, S3, S4, S5, S6, S7)
- Supplementary Tables (S1, S2)
- Supplementary Methods
- Supplementary References

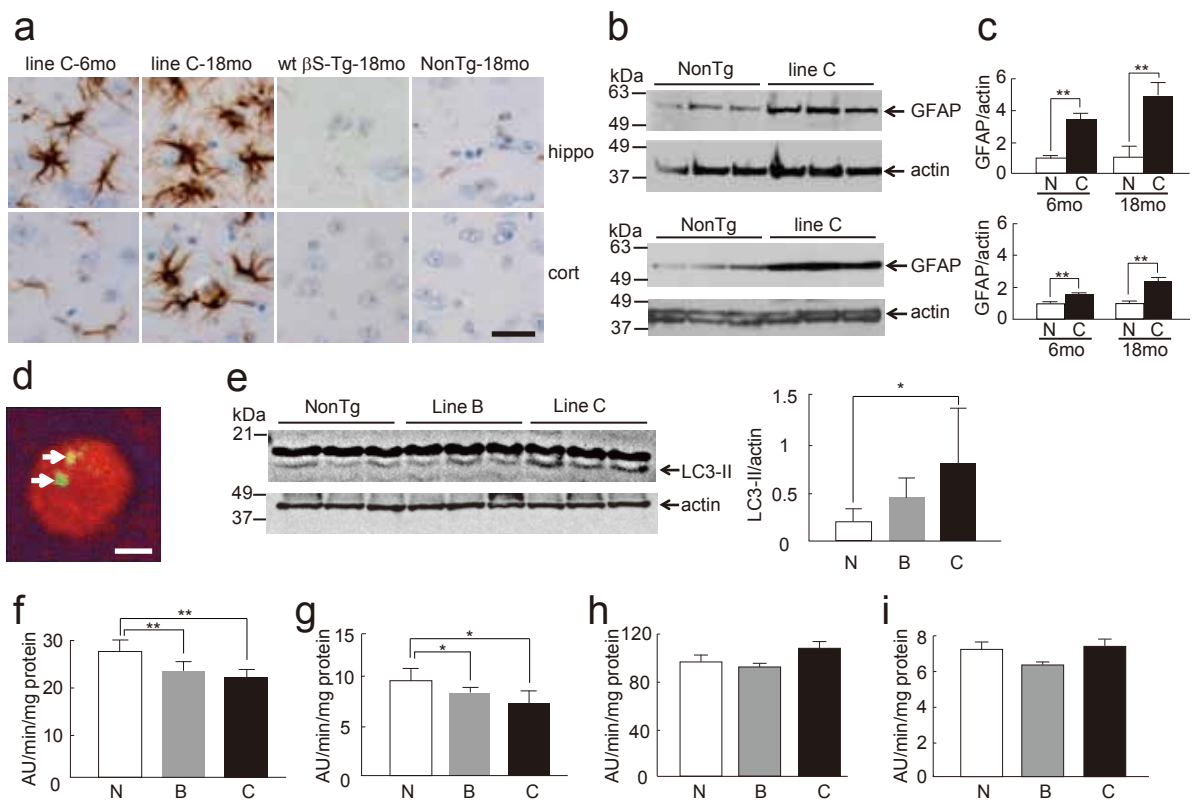

**Supplementary Figure S1. Characterization of astrogliosis and lysosomal dysfunction of P123H  $\beta$ S tg mice.**

(a) Immunohistochemistry of GFAP shows many activated astrocytes in the hippocampus (hippo) and cortex (cort) of P123H  $\beta$ S tg mice (line C) at 6 and 18 mo, but not in the same area of both wt  $\beta$ S tg mice (wt  $\beta$ S-Tg) and non-tg littermates (NonTg) at 18 mo. Scale bar=10  $\mu$ m. (b, c) Immunoblot analysis of GFAP for 1% triton-insoluble fractions of brain extracts prepared from hippocampus and cortex of P123H  $\beta$ S tg mice (line C) and non-tg littermates (NonTg). In b, representative blots for the hippocampus extracts of mice at 6 mo (upper) and 18 mo (lower) are shown. In c, quantification of the band intensities of GFAP versus actin was performed for the hippocampus (upper) and cortex (lower) extracts of mice (line C: C, NonTg: N) at 6 mo and 18 mo. Data are shown as the mean  $\pm$  SEM (n=8). \*\*: p<0.01. (d, e) Evaluation of LC3 immunoreactivity. In d, P123H  $\beta$ S-immunopositive (red) globules in the basal ganglia of 18 mo P123H  $\beta$ S tg mice (line C) were double-stained with anti-LC3 antibody (green). Arrows indicate LC3 positive dots. Scale bar = 2  $\mu$ m. In e, immunoblot analysis shows that LC3-II expression in the basal ganglia of P123H  $\beta$ S tg mice (line C) at 18 mo was higher than those in non-tg littermates. A representative blot and quantification of the band intensities of LC3-II versus actin are shown (line B: B, line C: C, NonTg: N). Data are shown as the mean  $\pm$  SEM (n=6). \*: p<0.05. (f-i) Lysosomal activities are decreased in P123H  $\beta$ S tg mice. Cathepsin and proteasome activities were measured as described in Supplementary Methods. Activities of cathepsin B (f) and D (g) in the striatum of P123H  $\beta$ S tg mice (line B: B, line C: C) at 18 mo were significantly lower than those in non-tg littermates (N), whereas no significant difference of proteasome activities, including peptidylglutamyl-peptide hydrolyzing activity (h) or chymotrypsin-like activity (i), were observed between two groups. Data are shown as the mean  $\pm$  SEM (n=5-7). \*: p<0.05, \*\*: p<0.01.

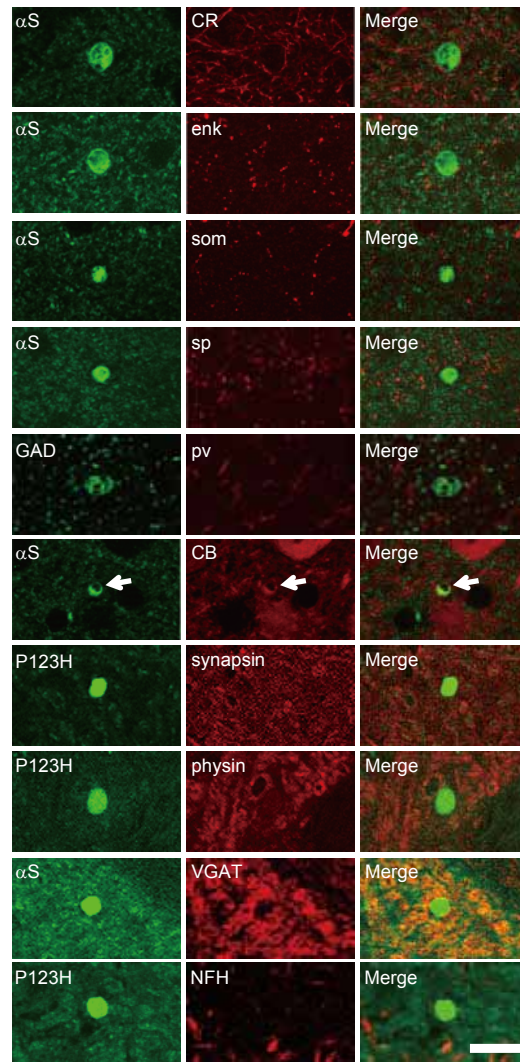

**Supplementary Figure S2. Double immunofluorescence analysis of globules in P123H  $\beta$ S tg mice.**

P123H  $\beta$ S-immunopositive globules in the basal ganglia of 18 mo P123H  $\beta$ S tg mice (line C) were consistently immunopositive for  $\alpha$ S and GAD (~100%) (Fig. 2e). Double immunofluorescence was performed using P123H  $\beta$ S,  $\alpha$ S, or GAD as a positive control. Vesicular GABA/glycine transporter (VGAT) was negative, but immunoreactivity for calbindin (CB) was weakly but consistently observed (arrows), suggesting that the globules were derived from projection type GABAergic neurons. Further results showed that calretinin (CR), enkephalin (enk), somatostatin (som), substance-P (sp), and parvalbumin (pv) were negative. Neither synaptic markers, such as synaptophysin (physin) and synapsin I (synapsin), nor axonal markers, including neurofilaments (NFH), were detectable. Scale bar=10  $\mu$ m.

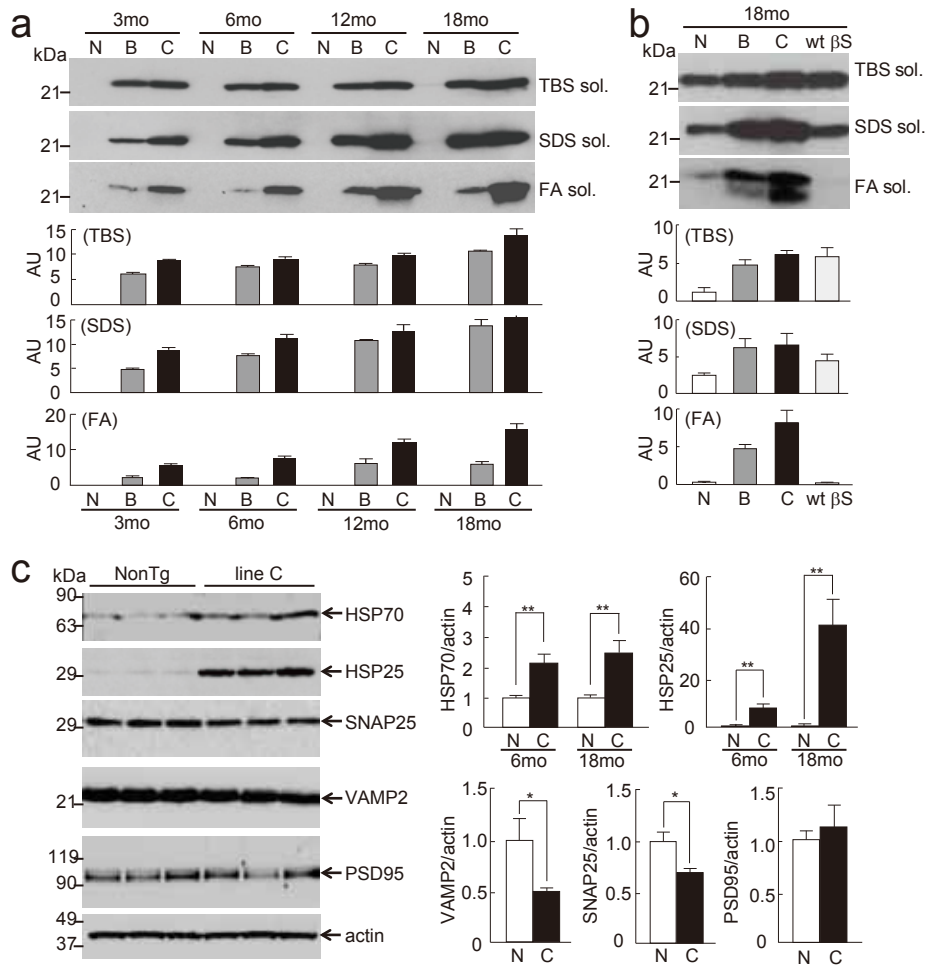

### Supplementary Figure S3. Biochemical analysis of neurodegeneration in P123H $\beta$ S tg mice.

(a, b) Age-dependent accumulation of P123H  $\beta$ S. In a, whole brain homogenates from mice (line B: B, line C: C, and non-tg littermates: N) at different ages (3, 6, 12 and 18 mo) were extracted into TBS SDS and FA fractions as described in Supplementary Methods. A representative immunoblot using anti-P123H  $\beta$ S is shown (upper panels) and the quantified band intensities of P123H  $\beta$ S (lower panel) are displayed in arbitrary units (AU). Data are shown as the mean  $\pm$  SEM ( $n=5$ ). In b, whole brain homogenates prepared from P123H  $\beta$ S tg mice (line B: B, line C: C), wt  $\beta$ S tg mice (wt  $\beta$ S), and age-matched non-tg mice (N) at 18 mo were sequentially extracted into TBS, SDS and FA fractions. Each fraction was analyzed by immunoblot with anti-pan- $\beta$ S antibody (upper panels). The quantified band intensities of  $\beta$ S are displayed in arbitrary units (AU) (lower panels). Data are shown as the mean  $\pm$  SEM ( $n=5$ ). (c) Immunoblot analysis of HSPs (HSP70 and HSP25) and synaptic proteins (VAMP2, SNAP25 and PSD95). Brain extracts were prepared from the cortex of P123H  $\beta$ S tg mice (line C) and non-tg littermates at 6 and 18 mo. Representative blots at 18 mo are shown (left panels). The band intensities of both HSPs and synaptic proteins were quantified against the actin bands (line C: C, NonTg: N) (right panels). Data are shown as the mean  $\pm$  SEM ( $n=8$ ). \*:  $p<0.05$ , \*\*:  $p<0.01$ .

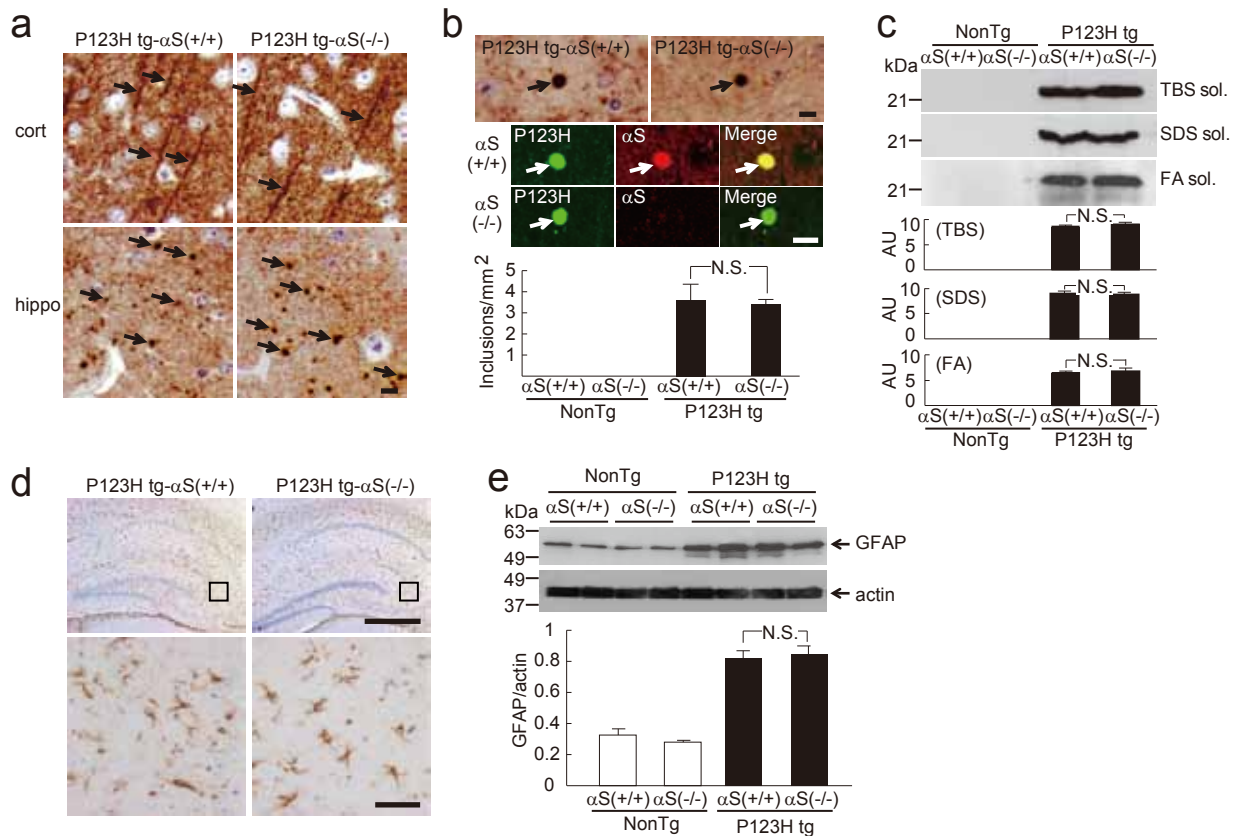

#### Supplementary Figure S4. Cross-breeding of P123H $\beta$ S tg mice with $\alpha$ S KO mice.

A cross-breeding of P123H  $\beta$ S tg mice with  $\alpha$ S KO mice was conducted as described in Supplementary Methods. Histological and biochemical analyses were performed to compare various neuropathological features between P123H  $\beta$ S tg- $\alpha$ S(-/-) and P123H  $\beta$ S tg- $\alpha$ S(+/+) mice. (a) Immunohistochemistry of P123H  $\beta$ S shows P123H  $\beta$ S accumulated in apical dendrites in the cortex (cort) and axonal dots in the hippocampus (hippo) were detected to similar extents between P123H  $\beta$ S tg- $\alpha$ S(-/-) and P123H  $\beta$ S tg- $\alpha$ S(+/+) mice (6 mo) (arrows). Scale bar=10  $\mu$ m. (b) Immunohistochemistry and immunofluorescence studies for the evaluation of globule formation in basal ganglia shows P123H  $\beta$ S-positive/ $\alpha$ S-negative inclusions in P123H  $\beta$ S tg- $\alpha$ S(-/-) mice (12 mo) and P123H  $\beta$ S-positive/ $\alpha$ S-positive inclusions in P123H  $\beta$ S tg- $\alpha$ S(+/+) mice. Scale bar=10  $\mu$ m. A histogram showing the number of inclusions is shown. Data are shown as the mean  $\pm$  SEM (n=4). N.S.: not significant. (c) Immunoblot analysis of P123H  $\beta$ S shows immunoreactivities of P123H  $\beta$ S in all the brain fractions (TBS, SDS and FA fractions) did not differ significantly between P123H  $\beta$ S tg- $\alpha$ S(-/-) and P123H  $\beta$ S tg- $\alpha$ S(+/+) mice. Representative blots are shown (upper) and quantitative data (lower) are displayed in arbitrary units (AU) (mean  $\pm$  SEM, n=4). N.S.: not significant. (d) Immunohistochemistry of GFAP. Similar levels of activated GFAP-positive astrocytes were observed in the hippocampus of P123H  $\beta$ S tg- $\alpha$ S(-/-) and P123H  $\beta$ S tg- $\alpha$ S(+/+) mice (6 mo). The lower panels are the insets from the upper panels. Scale bars=200  $\mu$ m (upper) and 20  $\mu$ m (lower). (e) Immunoblot analysis of GFAP shows immunoreactivity of GFAP did not differ significantly between P123H  $\beta$ S tg- $\alpha$ S(-/-) and P123H  $\beta$ S tg- $\alpha$ S(+/+) mice at 6 mo. A representative blot (upper) and quantification of the band intensities of GFAP against actin (lower) are shown. Data are shown as the mean  $\pm$  SEM (n=4). N.S.: not significant.

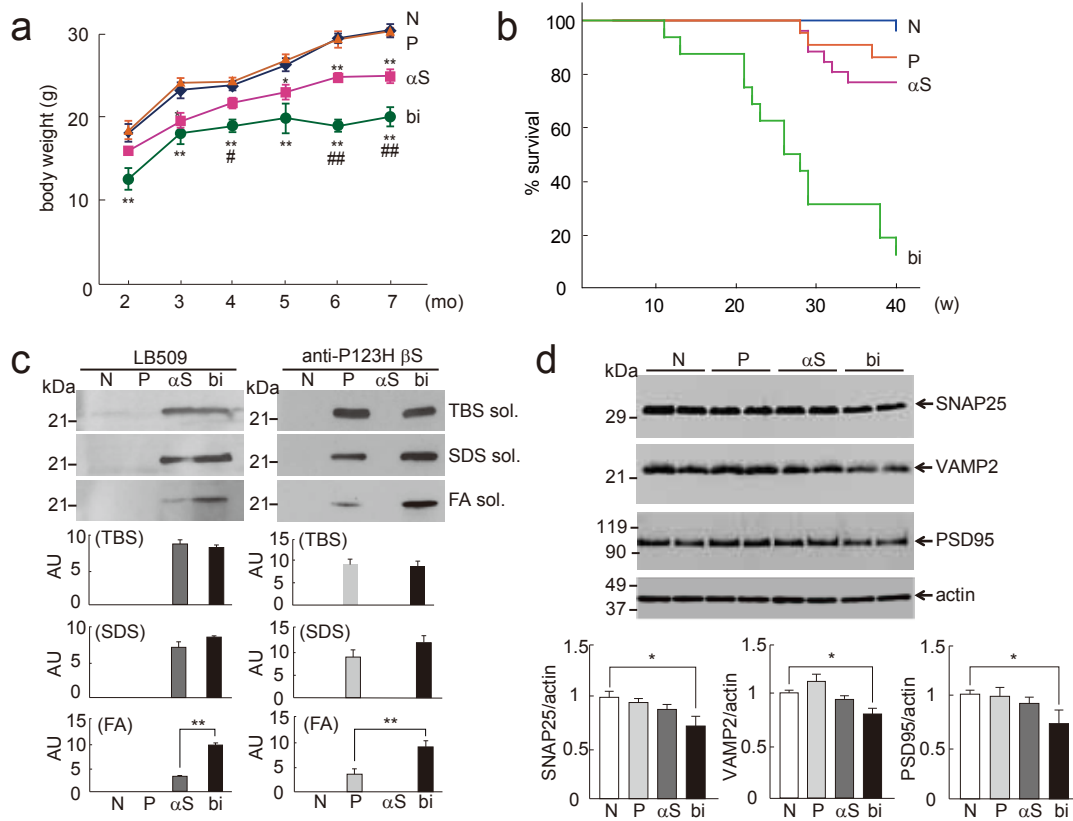

**Supplementary Figure S5. Characterization of various neurodegenerative features in bigenic mice overexpressing  $\alpha$ S and P123H  $\beta$ S.**

(a, b) Body weights and survival of bigenic (bi) mice and littermates ( $\alpha$ S tg:  $\alpha$ S, P123H  $\beta$ S tg: P, and non-tg: N) were analyzed. In a, bigenic mice had lower body weights compared to  $\alpha$ S tg mice.  $\alpha$ S tg mice but not P123H  $\beta$ S tg mice had lower body weights compared to non-tg littermates. Data are shown as the mean  $\pm$  SEM (n=18~24). \*: p<0.05, \*\*: p<0.01 versus non-tg mice. #:p<0.05, ##:p<0.01 versus  $\alpha$ S tg mice. In b, Kaplan-Meier survival curve analysis was completed using a log rank test (n=16~28). Bigenic mice showed lower survival (median lifespan of 27 weeks) compared to littermates. p<0.001. (c) Immunoblot analyses of human  $\alpha$ S and P123H  $\beta$ S. Brain homogenates from bigenic (bi) mice and littermates at 7 mo were sequentially extracted into TBS, SDS and FA fractions and analyzed using anti-human  $\alpha$ S specific LB509 (left) or anti-P123H  $\beta$ S antibody (right). Representative blots are shown (upper) and quantitative data (lower) are displayed in arbitrary units (AU) (mean  $\pm$  SEM, n=8). \*\*: p<0.01. (d) Decreased expression of synaptic proteins in bigenic mice. Homogenates of cortex were prepared from bigenic (bi) mice and littermates at 7 mo, and analyzed by immunoblot using anti-VAMP2, anti-SNAP25 and anti-PSD95 antibodies. Representative blots (upper) and data quantified against actin bands (lower) are shown (mean  $\pm$  SEM, n=8). \*: p<0.05.



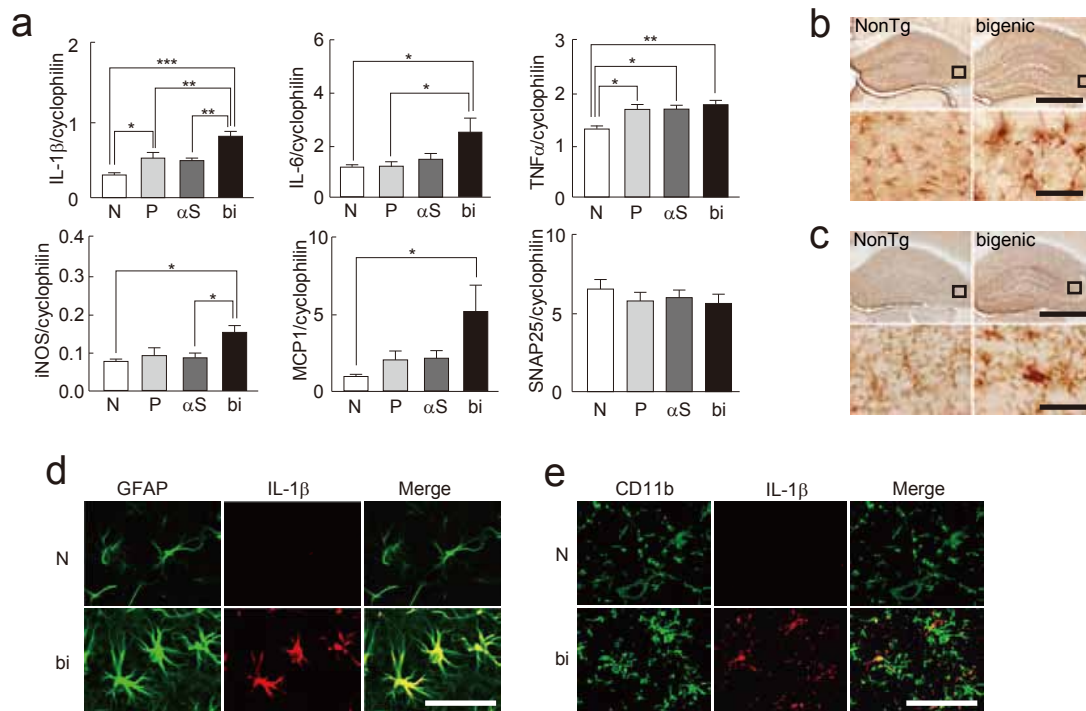

### Supplementary Figure S6. Enhanced neuroinflammation in bigenic mice.

Neuroinflammation conditions were analyzed for bigenic (bi) mice and littermates ( $\alpha$ S tg:  $\alpha$ S, P123H  $\beta$ S tg: P, and non-tg: N) at 6 mo. (a) Quantitative-PCR (qPCR) evaluation of neuroinflammation markers, including IL-1 $\beta$ , IL-6, iNOS, TNF $\alpha$ , MCP-1 and SNAP25. Total RNA was prepared from hippocampal regions of the brains derived from bigenic mice and littermates. qPCR was performed as described in Supplementary Method. Data are shown as the mean  $\pm$  SEM (n=5-7). \*: p<0.05, \*\*: p<0.01, \*\*\*: p<0.001. (b, c) Immunohistochemistry of GFAP (b) and CD11b (c) for hippocampus sections. Representative images of bigenic mice and non-tg (NonTg) littermates are shown. Scale bars=500  $\mu$ m (for upper panels) and 50  $\mu$ m (for lower panels). The lower panels are the insets from the upper panels. (d, e) Double immunofluorescence of IL-1 $\beta$  (red) with either GFAP (green) (d) or CD11b (green) (e) for hippocampus sections. Scale bar=50  $\mu$ m.

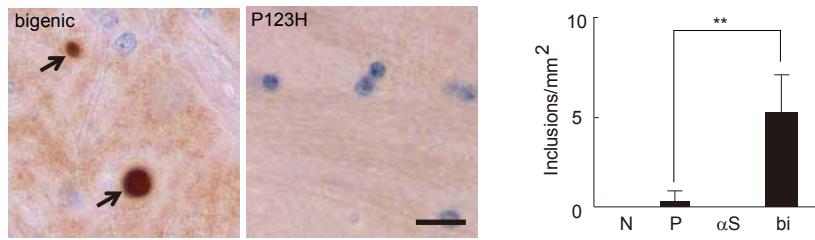

**Supplementary Figure S7. Globule formation in basal ganglia is accelerated in bigenic mice.**

Formation of P123H  $\beta$ S-immunopositive inclusions were observed in bigenic mice at 7 mo but not in littermates. Representative figures are shown with a histogram showing the number of inclusions in bigenic mice (bi) and littermates ( $\alpha$ S tg:  $\alpha$ S, P123H  $\beta$ S tg: P, and non-tg: N). Data are shown as the mean  $\pm$  SEM (n=8). \*\*:  $p < 0.01$ . Note that globule formation was significantly accelerated in bigenic mice compared to P123H  $\beta$ S tg mice. Scale bar=10  $\mu$ m.



| Primer                                                   | Accession no.  | Sequence                                                                 | Nucleotide position    | Product size |
|----------------------------------------------------------|----------------|--------------------------------------------------------------------------|------------------------|--------------|
| genotyping for wt- $\beta$ S Tg and $\beta$ syn(P123H)Tg | —              | F: 5'-TGCCCTACCAGCTGGCTGAC-3'<br>R: 5'-GCCCTTCATGAACACGTCCAT-3'          | —<br>—                 | 484 bp       |
| genotyping for $\alpha$ S Tg                             | —              | F: 5'-GACGGGTGTGACAGCAGTAGCC-3'<br>R: 5'-GATGATGGCATGCAGCACTGG-3'        | —<br>—                 | 349 bp       |
| genotyping for $\alpha$ S wild                           | —              | F: 5'-GGCGACGTGAAGGAGCCAGGGA-3'<br>R: 5'-CAGCGAAAGGAAAGCCGAGTGATGTACT-3' | —<br>—                 | 320 bp       |
| genotyping for $\alpha$ S KO                             | —              | F: 5'-CTTGGGTGGAGAGGCTATTC-3'<br>R: 5'-AGGTGAGATGACAGGAGATC-3'           | —<br>—                 | 280 bp       |
| mouse IL-1 $\beta$                                       | NM_008361.3    | F: 5'-CACCTCACAAAGCAGAGCACAA-3'<br>R: 5'-AGTCCAGCCCATACTTTAGGAAGAC-3'    | 788-808<br>867-891     | 104 bp       |
| mouse IL-6                                               | NM_031168.1    | F: 5'-ACAACCACGGCCTTCCCTACT-3'<br>F: 5'-CACGATTTCCAGAGAACATG-3'          | 92-112<br>200-220      | 129 bp       |
| mouse iNOS                                               | NM_010927.3    | F: 5'-CAGCTGGGCTGTACAAACCTT-3'<br>F: 5'-CATTGGAAGTGAAGCGTTTCG-3'         | 2175-2195<br>2249-2269 | 95 bp        |
| mouse TNF $\alpha$                                       | NM_013693.2    | F: 5'-GACCCTCACACTCAGATCATCTTCT-3'<br>F: 5'-CCTCCACTTGGTGGTTTGCT-3'      | 384-408<br>444-463     | 80 bp        |
| mouse MCP1                                               | NM_011333.3    | F: 5'-GTGCTGACCCCAAGAAGGAA-3'<br>F: 5'-TGCTGAAGACCTTAGGGCAGAT-3'         | 309-328<br>403-424     | 116 bp       |
| mouse SNAP25                                             | NM_011428.3    | F: 5'-TGAGGAAGGGATGGACAAA-3'<br>F: 5'-TGTTACAGGGACACACAAAAGC-3'          | 393-412<br>471-493     | 101 bp       |
| mouse CD11b                                              | NM_001082960.1 | F: 5'-CATCAACACAACCAGAGTGGATTC-3'<br>F: 5'-GCTCCTAAAACCAAGCTTTGGA-3'     | 1270-1293<br>1350-1371 | 102 bp       |
| mouse cyclophilin                                        | NM_008907.1    | F: 5'-TCCATGGCAAATGCTGGAC-3'<br>F: 5'-GTCTTGCCATTCTGGACCC-3'             | 336-354<br>477-496     | 161 bp       |

**Supplementary Table S1. Primers for genotyping and qPCR analysis of neuroinflammation.** Primers designed using Primer Express 1.0 software (Applied Biosystems, Foster City, CA) are listed .

| Antigen                    | Maker                                        | Code          | IHC     | IB      |
|----------------------------|----------------------------------------------|---------------|---------|---------|
| $\alpha$ synuclein         | BD biosciences (San Jose, CA)                | 610787        | 1:1000  | 1:5000  |
| $\beta$ synuclein          | BD biosciences (San Jose, CA)                | 612508        | 1:2000  | 1:5000  |
| Tyrosine hydroxylase       | BD biosciences (San Jose, CA)                | 612301        | 1:5000  | 1:10000 |
| $\alpha$ synuclein (LB509) | Invitrogen (Carlsbad, CA)                    | 18-0215       | —       | 1:5000  |
| GFAP                       | Progen (Heidelberg, Germany)                 | 65011         | 1:50    | 1:500   |
| GAD                        | Biomol International (Philadelphia, PA)      | GC3008        | 1:1000  | 1:5000  |
| GABA                       | Sigma (Saint Louis, MO)                      | A2052         | 1:2000  | —       |
| Actin                      | Sigma (Saint Louis, MO)                      | AC-15         | —       | 1:10000 |
| HSP70                      | Cell signaling (Danvers, MA)                 | 4872          | —       | 1:5000  |
| Phospho-c-jun (Ser73)      | Cell signaling (Danvers, MA)                 | 9164          | 1:300   | —       |
| PSD95                      | Cell signaling (Danvers, MA)                 | 3409          | —       | 1:5000  |
| Ubiquitin                  | Millipore (Billerica, MA)                    | MAB1510       | 1:200   | —       |
| Synaptophysin              | Millipore (Billerica, MA)                    | MAB5258       | 1:1000  | —       |
| Dopamine transporter       | Millipore (Billerica, MA)                    | MAB369        | —       | 1:5000  |
| NeuN                       | Millipore (Billerica, MA)                    | MAB377        | 1:1000  | —       |
| SNAP25                     | Synaptic Systems (Göttingen, Germany)        | 111111        | —       | 1:5000  |
| VAMP2                      | Synaptic Systems (Göttingen, Germany)        | 104211        | —       | 1:5000  |
| VGAT                       | Synaptic Systems (Göttingen, Germany)        | 131004        | 1:1000  | —       |
| Synapsin                   | Synaptic Systems (Göttingen, Germany)        | 106001        | 1:200   | —       |
| c-Fos                      | Santa Cruz (Santa Cruz, CA)                  | sc-52         | 1:10000 | —       |
| LC3                        | Novus Biologicals (Littleton, CO)            | NB600-1384SS  | 1:1000  | 1:5000  |
| Dopa decarboxylase         | Aviva Systems Biology (San Diego, CA)        | ARP41425_T100 | —       | 1:5000  |
| HSP25                      | Stressgen (Ann Arbor, MI)                    | SPA-801       | —       | 1:5000  |
| CD11b                      | AbD Serotec (Oxford, UK)                     | MCA711        | 1:500   | —       |
| IL-1 $\beta$               | Thermo Scientific (Rockford, IL)             | PR427B        | 1:1000  | —       |
| Dynorphin A                | Peninsula Laboratories Inc. (San Carlos, CA) | T-4280        | 1:2000  | —       |
| Parvalbumin                | Chemicon (Temecula, CA)                      | MAB1572       | 1:2000  | —       |
| Calretinin                 | Swant (Bellinzona, Switzerland)              | 7699/4        | 1:2000  | —       |
| Calbindin D-28K            | Swant (Bellinzona, Switzerland)              | Calb          | 1:5000  | —       |
| Neurofilament-H            | Covance (Berkeley, CA)                       | SMR-32R       | 1:1000  | —       |

### Supplementary Table S2. Antibodies for immunohistochemistry, immunofluorescence and immunoblot.

An antibody against P123H  $\beta$ S was custom-made at Sigma-Aldrich, Japan KK, Tokyo Japan. The antibody was generated by immunizing New Zealand white rabbits with the Keyhole limpet hemocyanin-conjugated synthetic peptide (NH-Cys-Glu-Asp-Pro-His-Gln-Glu-COOH). The affinity-purified anti-P123H  $\beta$ S antibody was used for immunohistochemistry (IHC) at 1:50 dilution and immunoblot (IB) analysis 1:500 dilution, respectively. This antibody was not cross-reactive with mouse endogenous wt  $\beta$ S. Anti-somatostatin antibody (IHC, 1:1000), anti-met-enkephalin (IHC, 1:1000) and anti-substance P (IHC, 1:1000) were kind gifts from Dr. Shigeo Daikoku (University of Tokushima)<sup>48</sup>, Dr. Shigeru Kobayashi (Shizuoka College of Pharmacy)<sup>49</sup> and Dr. Yoshihiro Tsuruo (University of Tokushima)<sup>50</sup>, respectively. Information of other primary antibodies used in the study is described in the list.

## **Supplementary Methods**

### **Preparation of the fractionated brain extracts for immunoblot analysis of P123H $\beta$ S and $\alpha$ S proteins**

Whole brain samples were homogenized in TBS and centrifuged at  $100,000 \times g$  for 30 min. The supernatants were collected as the TBS fraction. The pellets were extracted in 1% SDS and centrifuged at  $100,000 \times g$  for 30 min. The supernatants were collected as the SDS fraction. The pellets were re-extracted using 70% FA and centrifuged at 15,000 rpm. The supernatants were evaporated with speed vac, dissolved in SDS sample buffer, and used as the FA fraction. Protein concentrations of the TBS fraction were determined BioRad Protein Assay reagent (BioRad, Hercules, CA). Ten  $\mu$ g of the TBS fraction and the corresponding volume of SDS and FA fractions were used for immunoblot analysis.

### **Measurement of cathepsin and proteasome activity**

Cathepsin B and D activities were measured as previously described<sup>38</sup> with some modifications. Briefly, mice striatum and cortex samples were collected, sonicated in extraction buffer (50 mM HEPES (pH 6.0), 10 mM EDTA, 10 mM NaCl) and centrifuged at  $100,000 \times g$  for 30 min. Then, ten  $\mu$ g of the supernatants were incubated in the extraction buffer containing either Z-RR-AMC fluorogenic cathepsin B substrate (40  $\mu$ M) or Bz-RGFFP-4-MeObNA cathpsin D substrate (40  $\mu$ M) (Chemicon). For measurement of proteasome activities, 10  $\mu$ g of the supernatants were incubated in the extraction buffer (50 mM HEPES (pH 7.4), 10 mM EDTA, 10 mM NaCl) containing either Z-LLE-AMC fluorogenic substrate (40  $\mu$ M) (Chemicon) for peptidylglutamyl-peptide hydrolyzing activity or Z-VKM-AMC substrate (40  $\mu$ M) (Chemicon) for chymotrypsin-like activity. These enzyme activities were assayed by continuous recording of the fluorescence activity released from fluorogenic substrate using Berthold Mithras LB940 microplate reader (Berthold, Bad Wildbad, Germany) for 1 h at 37 °C (excitation 380 nm, emission 460 nm for cathepsin B and proteasome and excitation 345 nm, emission 425 nm for cathepsin D) and the reaction rate was analyzed. These enzyme activities were described as arbitrary unit/min/mg protein.

### **Cross-breeding experiment of P123H $\beta$ S tg mice with $\alpha$ S KO mice.**

$\alpha$ S KO mice were primarily purchased from Jackson laboratory (Bar Harbor, ME)<sup>51,52</sup> and were maintained by successive (more than 7 generations) backcrossing into the C57BL/6 strain. A cross-breeding experiment of P123H  $\beta$ S tg mice with  $\alpha$ S KO mice was conducted as previously described<sup>53</sup> with modifications. Briefly, P123H  $\beta$ S tg mice (line C, heterozygote) were first crossed with these  $\alpha$ S KO mice. Among their littermates, P123H  $\beta$ S tg/ $\alpha$ S heterozygote mice and  $\alpha$ S heterozygote mice were used for further cross-breeding. Among the resulting littermates, P123H  $\beta$ S tg/ $\alpha$ S KO mice: P123H  $\beta$ S tg- $\alpha$ S(-/-), P123H  $\beta$ S tg mice: P123H  $\beta$ S tg- $\alpha$ S(+/+),  $\alpha$ S KO mice: NonTg- $\alpha$ S(-/-), and control mice: NonTg- $\alpha$ S(+/+) were subjected to histological and biochemical analyses. After extraction of genomic DNA from tail biopsies, genotyping of P123H  $\beta$ S and murine endogenous  $\alpha$ S was performed by PCR using specific primers (Supplementary Table S1).

### **qPCR evaluation of neuroinflammation markers**

Total RNA was prepared from hippocampal regions of the brains derived from bigenic mice and littermates. cDNA was synthesized from 2.5  $\mu$ g of total RNA using a Superscript III First-Strand Synthesis System (Invitrogen). qPCR was performed using 2 $\times$  master mix composed of SYBR Green PCR core reagents (Roche) and 30 nM primers in an ABI Prism 7700 system (Applied Biosystems) using the following sequence: 2 min at 50°C, 10 min at 95°C, 40 cycles of 15 s at 95°C, and 1 min at 60°C. The mRNA expression level of each gene was normalized to that of cyclophilin. The primers used for the evaluation of neuroinflammation are described in Supplementary Table S1.

## Supplementary References

48. Daikoku, S., Hisano, S., Kawano, H., Okamura, Y. & Tsuruo, Y. Ontogenetic studies on the topographical heterogeneity of somatostatin-containing neurons in rat hypothalamus. *Cell Tissue Res.* **233**, 347-354 (1983).
49. Kobayashi, S. *et al.* Immunocytochemical demonstration of the co-storage of noradrenaline with Met-enkephalin-Arg6-Phe7 and Met-enkephalin-Arg6-Gly7-Leu8 in the carotid body chief cells of the dog. *Arch. Histol. Jpn.* **46**, 713-722 (1983).
50. Tsuruo, Y., Kawano, H., Nishiyama, T., Hisano, S. & Daikoku, S. Substance P-like immunoreactive neurons in the tuberoinfundibular area of rat hypothalamus. Light and electron microscopy. *Brain Res.* **289**, 1-9 (1983).
51. Abeliovich, A. *et al.* Mice lacking alpha-synuclein display functional deficits in the nigrostriatal dopamine system. *Neuron* **25**, 239-252 (2000).
52. Nakai, M. *et al.* Expression of alpha-synuclein, a presynaptic protein implicated in Parkinson's disease, in erythropoietic lineage. *Biochem. Biophys. Res. Commun.* **358**, 104-110 (2007).
53. Chandra, S., Gallardo, G., Fernandez-Chacon, R., Schluter, O.M. & Sudhof, T.C. Alpha-synuclein cooperates with CSPalpha in preventing neurodegeneration. *Cell* **123**, 383-396 (2005).
